# Supplementary material for: A fluorescent perylene-assembled polyvinylpyrrolidone film: synthesis, morphology and nanostructure
Source: Royal Society of Chemistry journal article supplement (doi:10.1039/c3sm52350k), 2014-01-01
Supplement: c3sm52350k1.pdf [file c3sm52350k1.pdf]

## Supporting Information

### A Fluorescent Perylene-assembled Polyvinylpyrrolidone Film: Synthesis, Morphology and Nanostructure

Mengmeng Sun, Yong He, Wantai Yang and Meizhen Yin\*

State Key Laboratory of Chemical Resource Engineering, Key Laboratory of Carbon Fiber and Functional Polymers, Ministry of Education, Beijing University of Chemical Technology, 100029 Beijing, China, Email: [yinmz@mail.buct.edu.cn](mailto:yinmz@mail.buct.edu.cn).

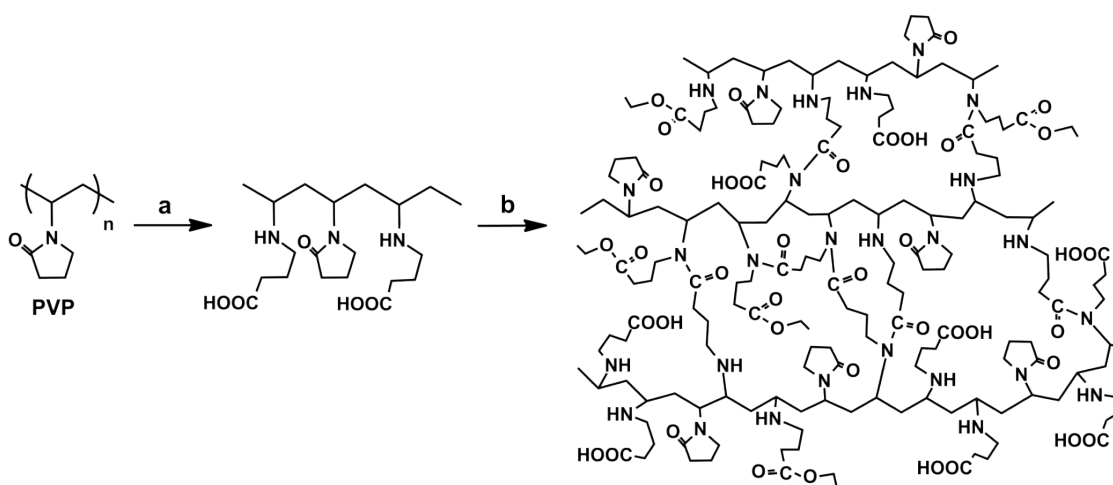

**Scheme S1** The ring-opening (a) and self-crosslinking (b) process of PVP at 160 °C.

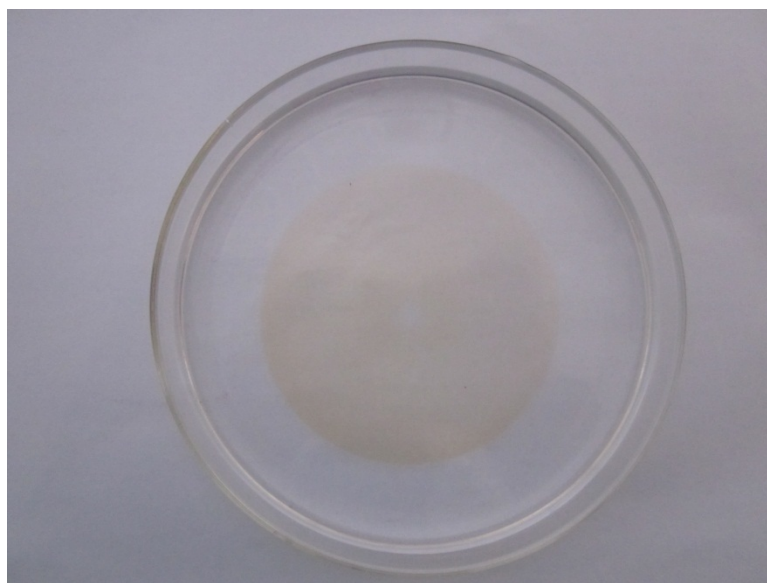

**Fig. S1** Digital photograph of the blank PVP film.

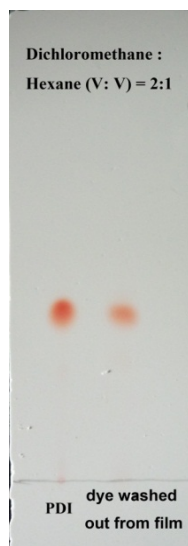

**Fig. S2** Thin layer chromatography of PDI and the dye washed out from the PVP-based PDI film.

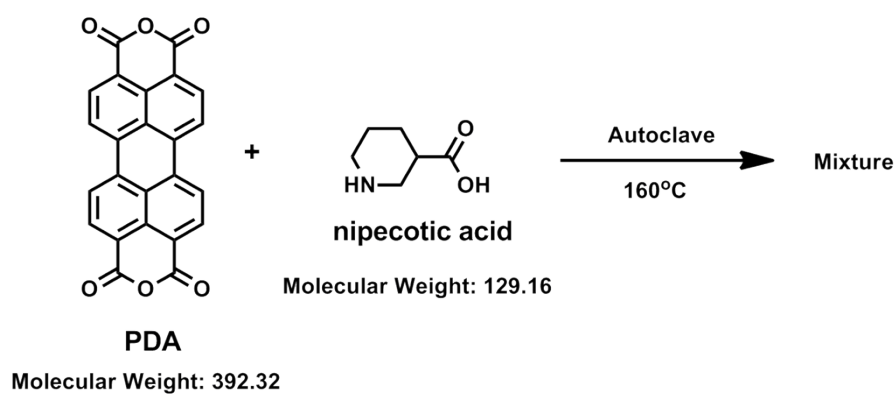

**Scheme S2** Reaction of PDA and nipecotic acid at 160 °C in autoclave .

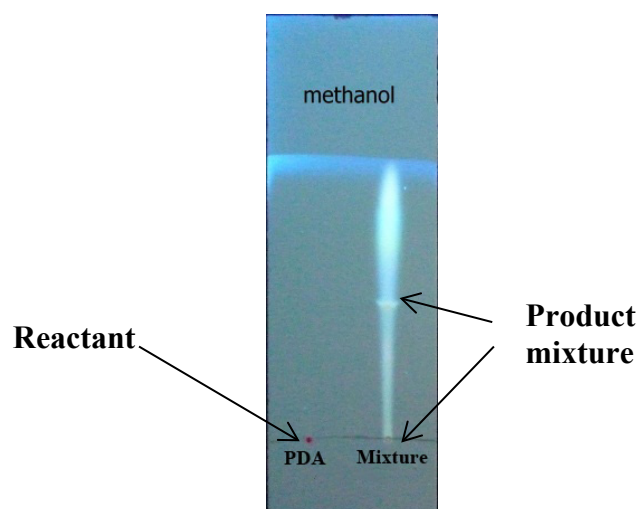

**Fig. S3** TLC of PDA and their product mixture (Note: TLC of product mixture was different from that of reactant of PDA, indicating a reaction of PDA and nipecotic acid occurred).

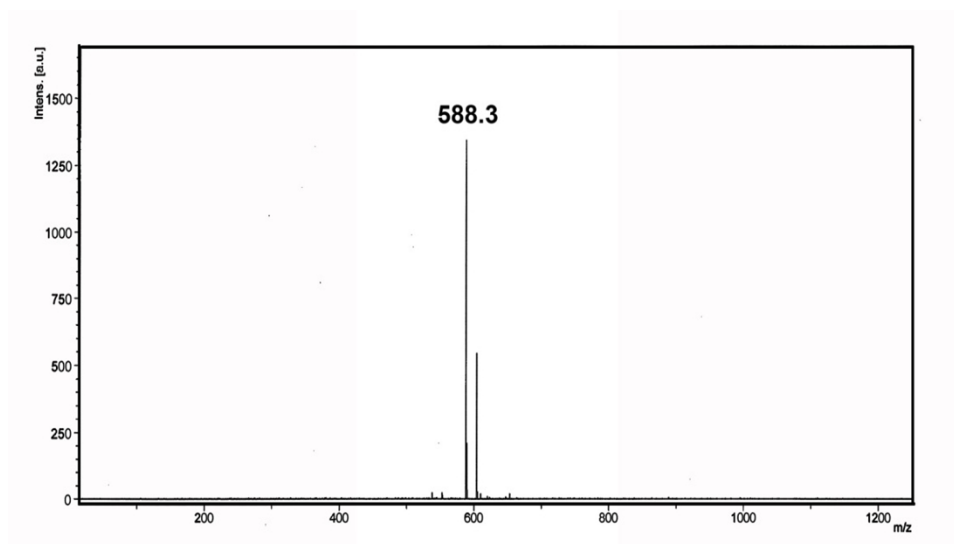

**Fig. S4** MALDI-TOF MS of above product mixture originated from the reaction of PDA and nipecotic acid. (Note: No signal at mass 392.32 derived from PDA could be found, indicating PDA was used up during the reaction.)

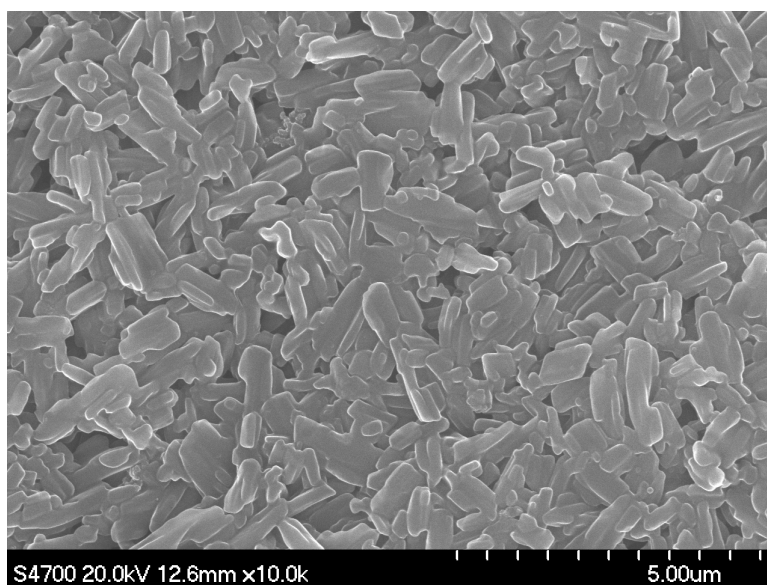

**Fig. S5** SEM image of the fluorescent PDA-assembled PVP film ( $W_{\text{PVP}}/W_{\text{PDA}} = 10/1$ ).

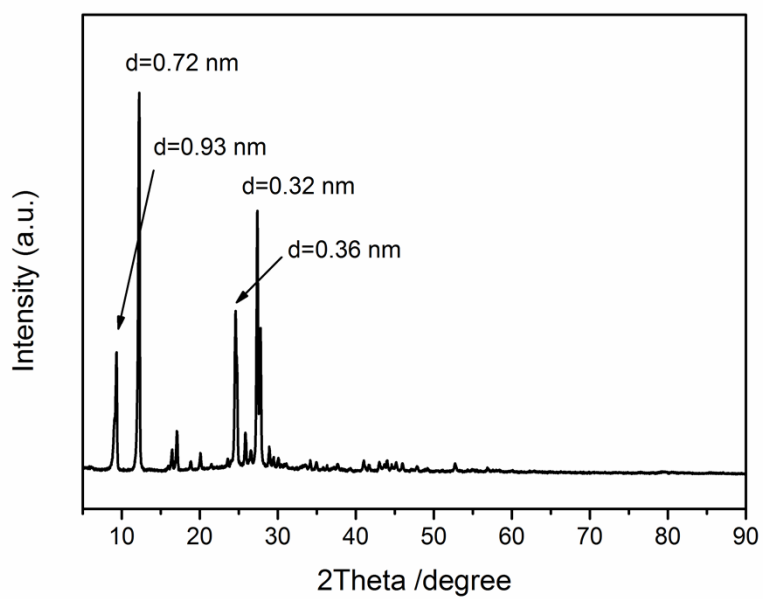

**Fig. S6** XRD pattern of pure PDA.

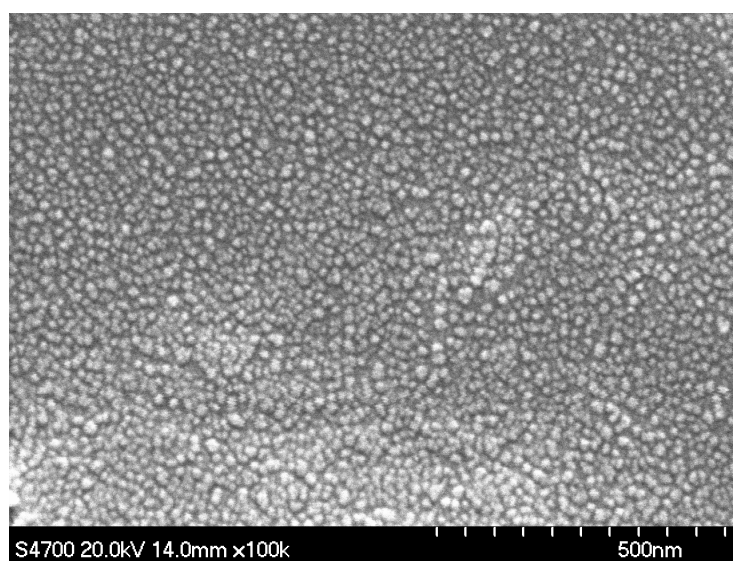

**Fig. S7** SEM image of the PDI film.
